# Supplementary material for: Therapeutic effects of a single injection of human umbilical mesenchymal stem cells on acute and chronic colitis in mice
Source: PubMed Central journal article supplement (PMC6456500; doi:10.1038/s41598-019-41910-x), 2019-04-09
Supplement: 41598_2019_41910_MOESM1_ESM.pdf [file 41598_2019_41910_MOESM1_ESM.pdf]

## **Supplementary Information**

### **Therapeutic effects of a single injection of human umbilical mesenchymal stem cells on acute and chronic colitis in mice**

Yu-Lung Chang<sup>1,2,3,7</sup>, Huei-Yu Lo<sup>4,7,8</sup>, Shun-Ping Cheng<sup>4,7</sup>, Kuo-Ting Chang<sup>7</sup>,  
Xiu-Fang Lin<sup>2</sup>, Sheng-Pien Lee<sup>1</sup>, Ming-Fa Hsieh<sup>2\*</sup>, Chin-Kan Chan<sup>5,6,7\*</sup>

<sup>1</sup> Department of Urology, Taoyuan General Hospital, Ministry of Health and  
Welfare, Taoyuan, Taiwan

<sup>2</sup> Department of Biomedical Engineering, College of Engineering, Chung Yuan  
Christian University, Chung Li, Taiwan

<sup>3</sup> Department of Urology, School of Medicine, National Yang-Ming University,  
Taipei, Taiwan

<sup>4</sup> Department of Rehabilitation, Taoyuan General Hospital, Ministry of Health  
and Welfare, Taoyuan, Taiwan

<sup>5</sup> Department of Pediatrics, Taoyuan General Hospital, Ministry of Health and  
Welfare, Taoyuan, Taiwan

<sup>6</sup> Department of Biotechnology, School of Health Technology, Ming Chuan  
University, Taoyuan, Taiwan

<sup>7</sup> Translational Medicine Center, Taoyuan General Hospital, Ministry of Health  
and Welfare, Taoyuan, Taiwan

<sup>8</sup>Department of Chemistry, Chung Yuan Christian University, Chung Li, Taiwan

Supplementary Table S1

P value of disease activity index (Control group vs. PBS group)

(Mann-Whitney U test)

|     |         |         |         |         |         |         |         |
|-----|---------|---------|---------|---------|---------|---------|---------|
| Day | 0       | 1       | 2       | 3       | 4       | 5       | 6       |
| P   | 0.6531  | <0.0001 | <0.0001 | <0.0001 | <0.0001 | <0.0001 | <0.0001 |
| Day | 7       | 8       | 9       | 10      | 11      | 12      | 13      |
| P   | <0.0001 | <0.0001 | 0.0003  | 0.0006  | 0.0005  | 0.0005  | 0.0081  |
| Day | 14      | 15      | 16      | 17      | 18      | 19      | 20      |
| P   | 0.0038  | 0.0038  | 0.0062  | 0.0034  | 0.0062  | 0.0034  | 0.0073  |
| Day | 21      | 22      | 23      | 24      | 25      |         |         |
| P   | 0.0062  | 0.0073  | 0.0062  | 0.0056  | 0.0034  |         |         |

Supplementary Table S2

P value of disease activity index (Control group vs. hUCMSCs group) (Mann-Whitney U test)

|     |         |         |         |         |         |         |        |
|-----|---------|---------|---------|---------|---------|---------|--------|
| Day | 0       | 1       | 2       | 3       | 4       | 5       | 6      |
| P   | 0.7101  | 0.0158  | <0.0001 | <0.0001 | <0.0001 | <0.0001 | 0.0001 |
| Day | 7       | 8       | 9       | 10      | 11      | 12      | 13     |
| P   | <0.0001 | <0.0001 | 0.0005  | 0.0011  | 0.0007  | 0.0016  | 0.0280 |
| Day | 14      | 15      | 16      | 17      | 18      | 19      | 20     |
| P   | 0.0055  | 0.0047  | 0.0209  | 0.0055  | 0.0253  | 0.0055  | 0.0477 |
| Day | 21      | 22      | 23      | 24      | 25      |         |        |
| P   | 0.0209  | 0.0477  | 0.0253  | 0.0253  | 0.0047  |         |        |

Supplementary Table S3

P value of disease activity index (PBS group vs. hUCMSCs group) (Mann-Whitney U test)

|     |        |        |        |        |        |        |        |
|-----|--------|--------|--------|--------|--------|--------|--------|
| Day | 0      | 1      | 2      | 3      | 4      | 5      | 6      |
| P   | 0.9481 | 0.0002 | 0.0326 | 0.0117 | 0.0349 | 0.0362 | 0.0001 |
| Day | 7      | 8      | 9      | 10     | 11     | 12     | 13     |
| P   | 0.0010 | 0.0007 | 0.0291 | 0.0286 | 0.0023 | 0.0025 | 0.0339 |
| Day | 14     | 15     | 16     | 17     | 18     | 19     | 20     |
| P   | 0.0308 | 0.0262 | 0.0308 | 0.0396 | 0.0262 | 0.0262 | 0.0262 |

|     |        |        |        |        |        |  |  |
|-----|--------|--------|--------|--------|--------|--|--|
| Day | 21     | 22     | 23     | 24     | 25     |  |  |
| P   | 0.0456 | 0.0396 | 0.0262 | 0.0219 | 0.0219 |  |  |

Supplementary methods

### **Immunohistochemistry staining for the detection of hUCMSCs**

Paraffin embedded organs of hUCMSCs groups including lungs, liver, spleen, kidneys, colon, heart, testes, seminal vesicles, and bladder were cut into 5  $\mu\text{m}$  thick sections, placed on poly-L-lysine coated slides, deparaffinized in a 70 °C oven for 20 minutes and in xylene for 20 minutes and rehydrated with graded alcohol. Tissue sections were incubated in Epitope Retrieval Solution pH 6 (Leica: RE7113-CE, Leica Microsystems (SEA) Pte Ltd., Harbourfront Centre Singapore, Singapore) for 15 min in an electronic pressure cooker (Panasonic SR-P37, Panasonic Corporation, Osaka, Japan) for antigen retrieval. Further steps were performed according to the manufacturer's instructions. Tissue sections were incubated with mouse anti-human nuclei primary antibody (merck Millipore: MAB1281, Merck KGaA, Darmstadt, Germany) at 4°C overnight in a humidified chamber. The sections were then incubated with the indicated goat anti-mouse secondary antibody (KPL, 5220-0286, SeraCare Life Sciences Inc., Milford MA, USA) for 30 min at room temperature. Horseradish peroxidase activity was detected by 3, 3'diaminobenzidine (DAB), which served as a

chromogen (DAB; BiotnA Biotech, Kaohsiung, Taiwan), for 15 minutes. All the steps were washed 3 times in PBS for 5 minutes each. The sections were finally counterstained with hematoxylin, dehydrated with alcohol, cleared in xylene and mounted with Neo-Mount. Negative controls were also performed without applying the primary antibody.

### Supplementary Figures

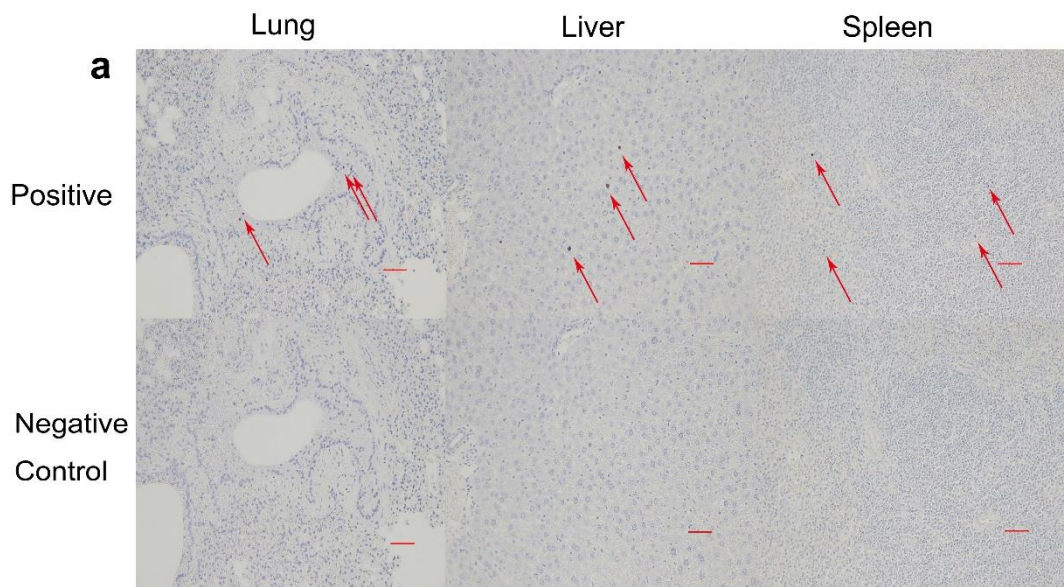

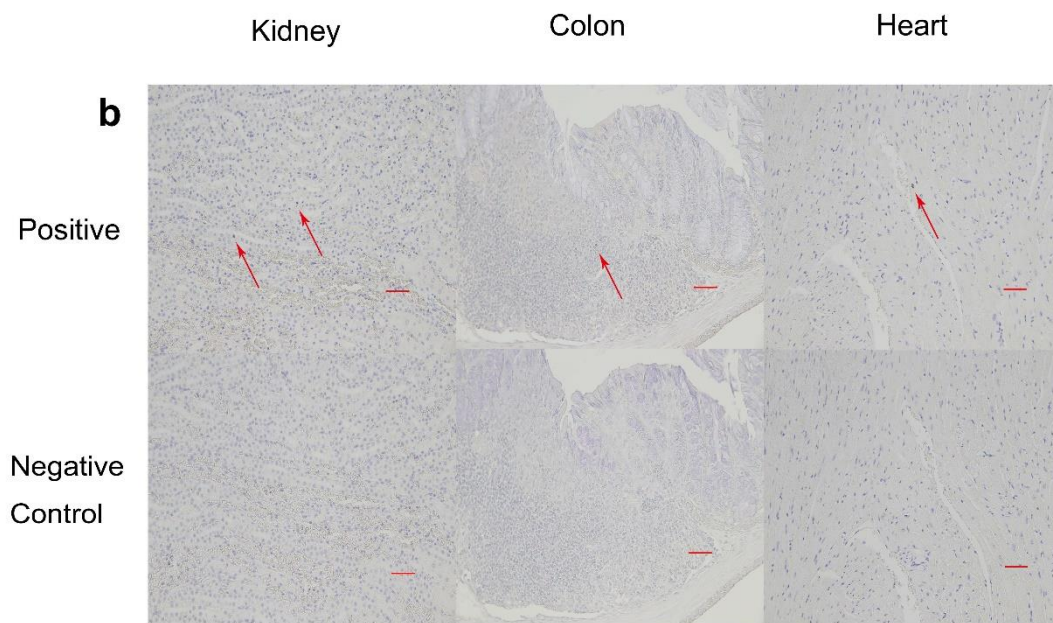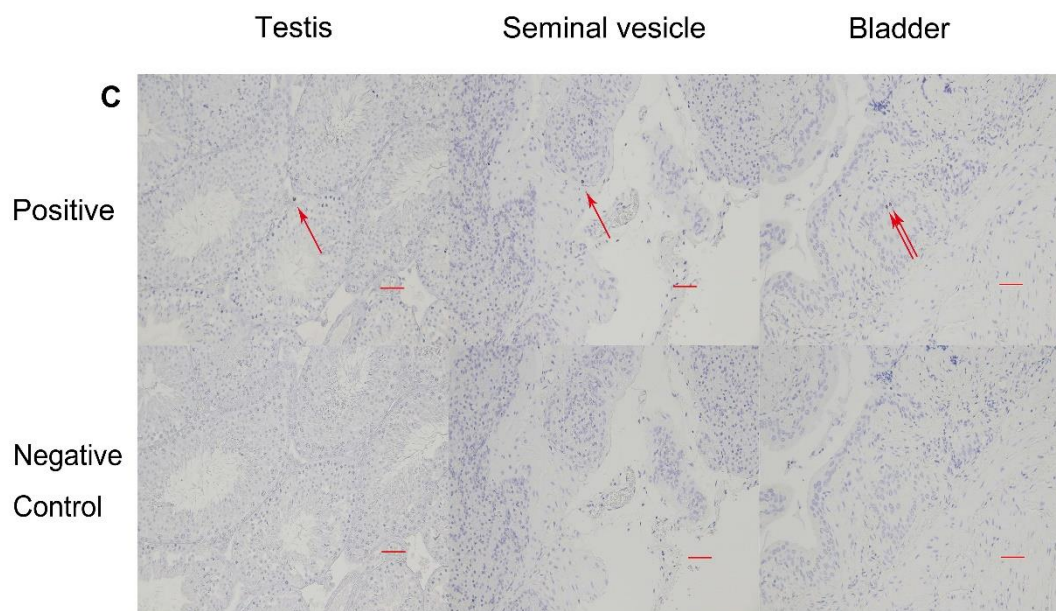

Supplementary Fig S1 Immunohistochemistry staining for hUCMSCs in mouse organs on day 3. The hUCMSCs were stained with a mouse anti-human nuclei monoclonal antibody and a goat anti-mouse secondary antibody (Positive). Negative control was performed without applying primary antibody. The red arrows point out the hUCMSCs. Original magnification  $\times 200$ . Scale bar is 50  $\mu\text{m}$ .

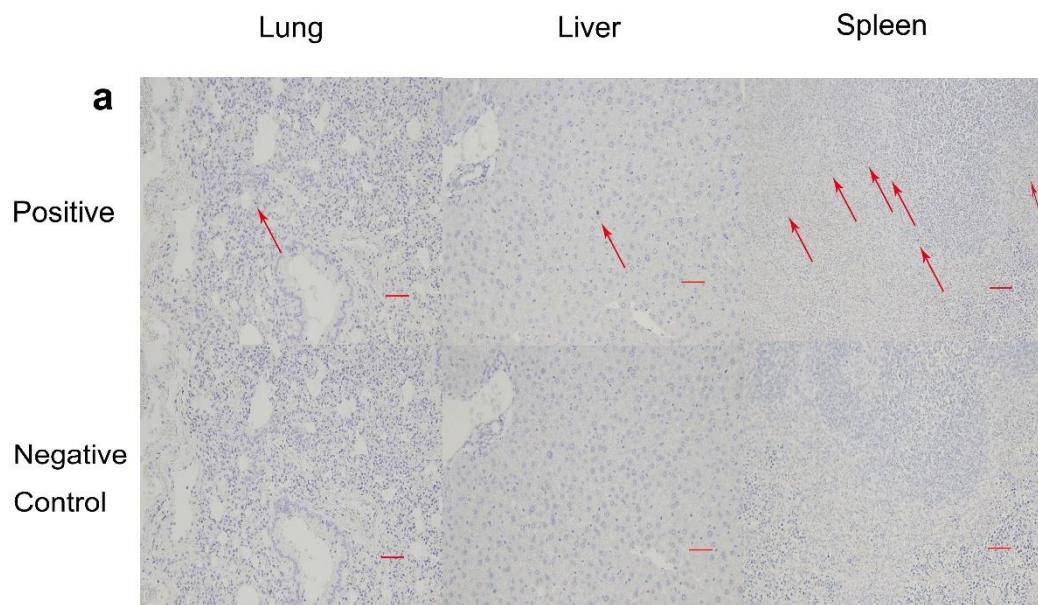

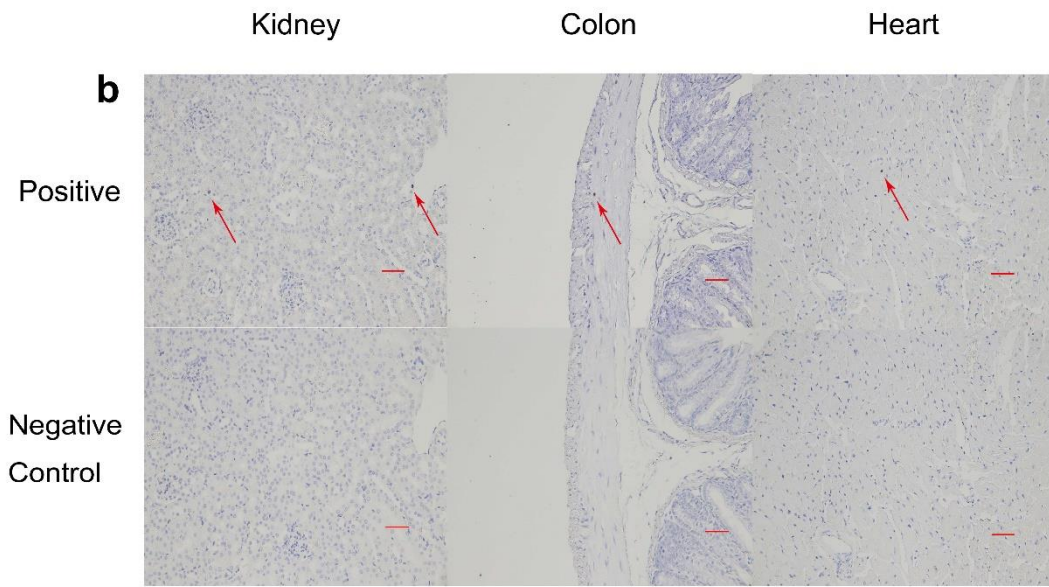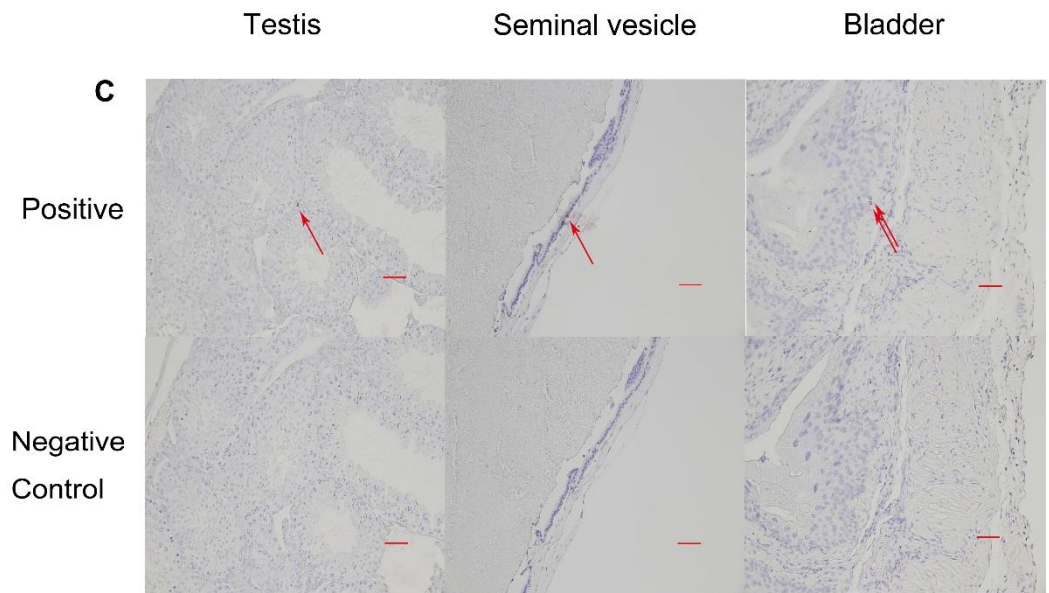

Supplementary Fig S2 Immunohistochemistry staining for hUCMSCs in mouse organs on day 8. The hUCMSCs were stained with a mouse anti-human nuclei monoclonal antibody and a goat anti-mouse secondary antibody (Positive). Negative control was performed without applying primary antibody. The red arrows point out the hUCMSCs. Original magnification  $\times 200$ . Scale bar is 50  $\mu\text{m}$ .

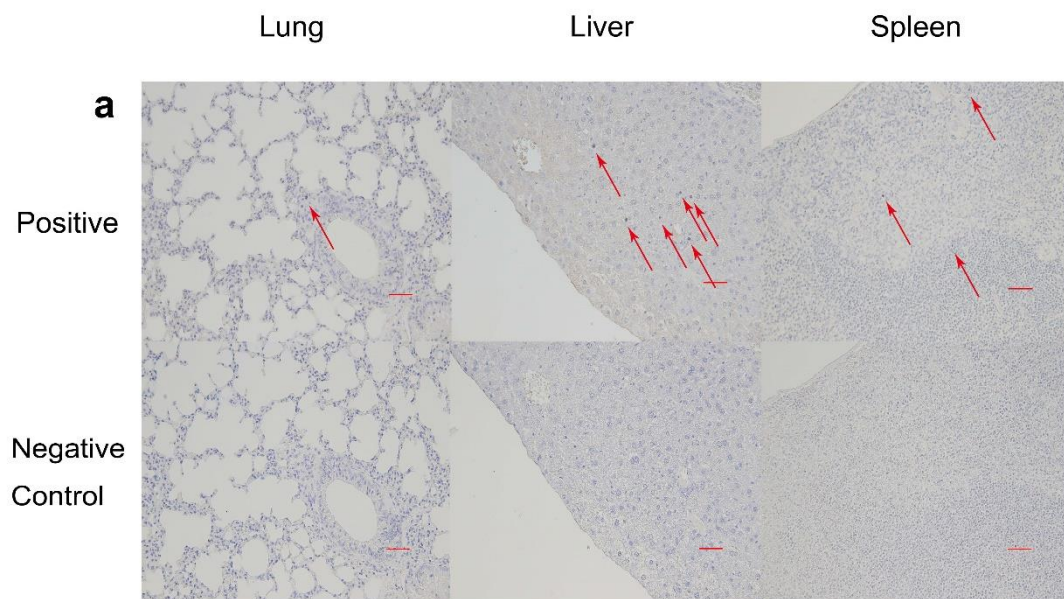



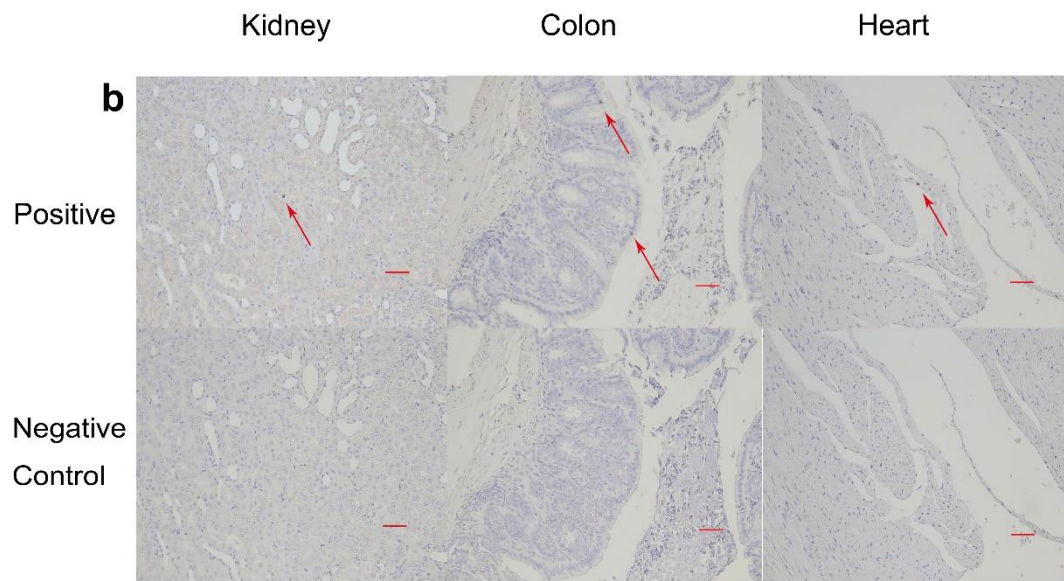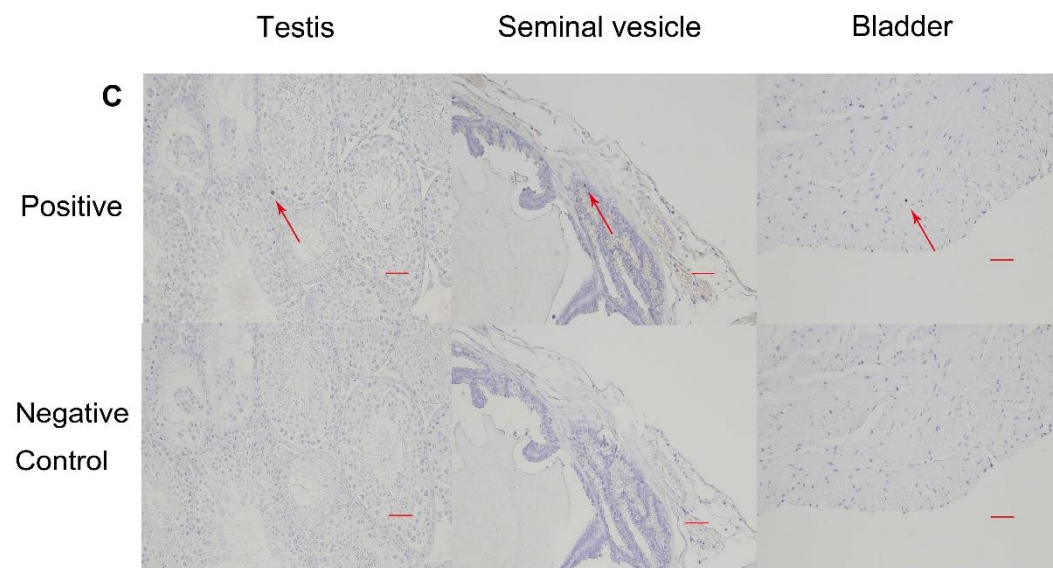

Supplementary Fig S3 Immunohistochemistry staining for hUCMSCs in mouse organs on day 25. The hUCMSCs were stained with a mouse anti-human nuclei monoclonal antibody and a goat anti-mouse secondary antibody (Positive). Negative control was performed without applying primary antibody. The red arrows point out the hUCMSCs. Original magnification  $\times 200$ . Scale bar is 50  $\mu\text{m}$ .
